# Supplementary material for: Subtropical gyre persistence in the Gulf of Cadiz, southern Iberian margin, interrupted by extremely cold surface water incursions during the Early – Middle Pleistocene Transition
Source: Copernicus journal article supplement (doi:10.5194/egusphere-2024-3185), 2024-10-25

**Supplementary material for**  
**Mega et al. “Subtropical gyre persistence in the Gulf of Cadiz, southern Iberian margin,**  
**interrupted by extremely cold surface water incursions during the Early – Middle**  
**Pleistocene Transition”**

**Supplementary Table 1** Province assemblage means for the different Marine Isotopic Stages (MIS) at IODP Site U1387

| <b>MIS</b> | <b>%<br/>Tropical+Subtropical<br/>Species</b> | <b>%<br/>Transitional<br/>Species</b> | <b>%<br/>Polar+Subpolar<br/>Species</b> |
|------------|-----------------------------------------------|---------------------------------------|-----------------------------------------|
| 18         | 12.78                                         | 57.74                                 | 29.48                                   |
| 19         | 20.97                                         | 45.75                                 | 32.84                                   |
| 20         | 24.92                                         | 46.84                                 | 28.25                                   |
| 21         | 26.93                                         | 38.06                                 | 34.92                                   |
| 22         | 19.72                                         | 30.33                                 | 49.90                                   |
| 23         | 23.56                                         | 31.28                                 | 45.09                                   |
| 24         | 16.25                                         | 43.04                                 | 40.67                                   |
| 25         | 27.04                                         | 41.13                                 | 31.83                                   |
| 26         | 19.73                                         | 41.80                                 | 38.47                                   |
| 27         | 21.42                                         | 47.15                                 | 31.44                                   |
| 28         | 16.92                                         | 35.03                                 | 48.05                                   |

**Supplementary figure 1:** SEM images of *N. pachyderma* from IODP Site U1387

1-2: U1387B-21X-1 52-54 cm, scale bar 100µm, 790.25 ka; 3-5: U1387B-22X-3 52.5-54.5 cm; scale bar 100µm; 863.92 ka; 6: U1387B-22X-3 78-80 cm, scale bar 200µm, 866.01 ka; 7-10: U1287B-22X-3 102-104 cm, scale bar 100µm, 867.92 ka; 11-12: U1387B-22X-3 120-122 cm, scale bar 200µm, 869.36 ka; 13: U1387A-23X-2 88-90 cm, scale bar 200µm, 890.80 ka; 14: U1387B-24X-CC 21-23 cm, scale bar 100µm, 958.41 ka; 15-18: U1387B-24X-CC 26-28 cm; 15, 16 scale bar 200µm, 17, 18 scale bar 100 µm, 958.54 ka; 19-20: U1387B-25X-6 125-127 cm, scale bar 200µm, 1001.26 ka

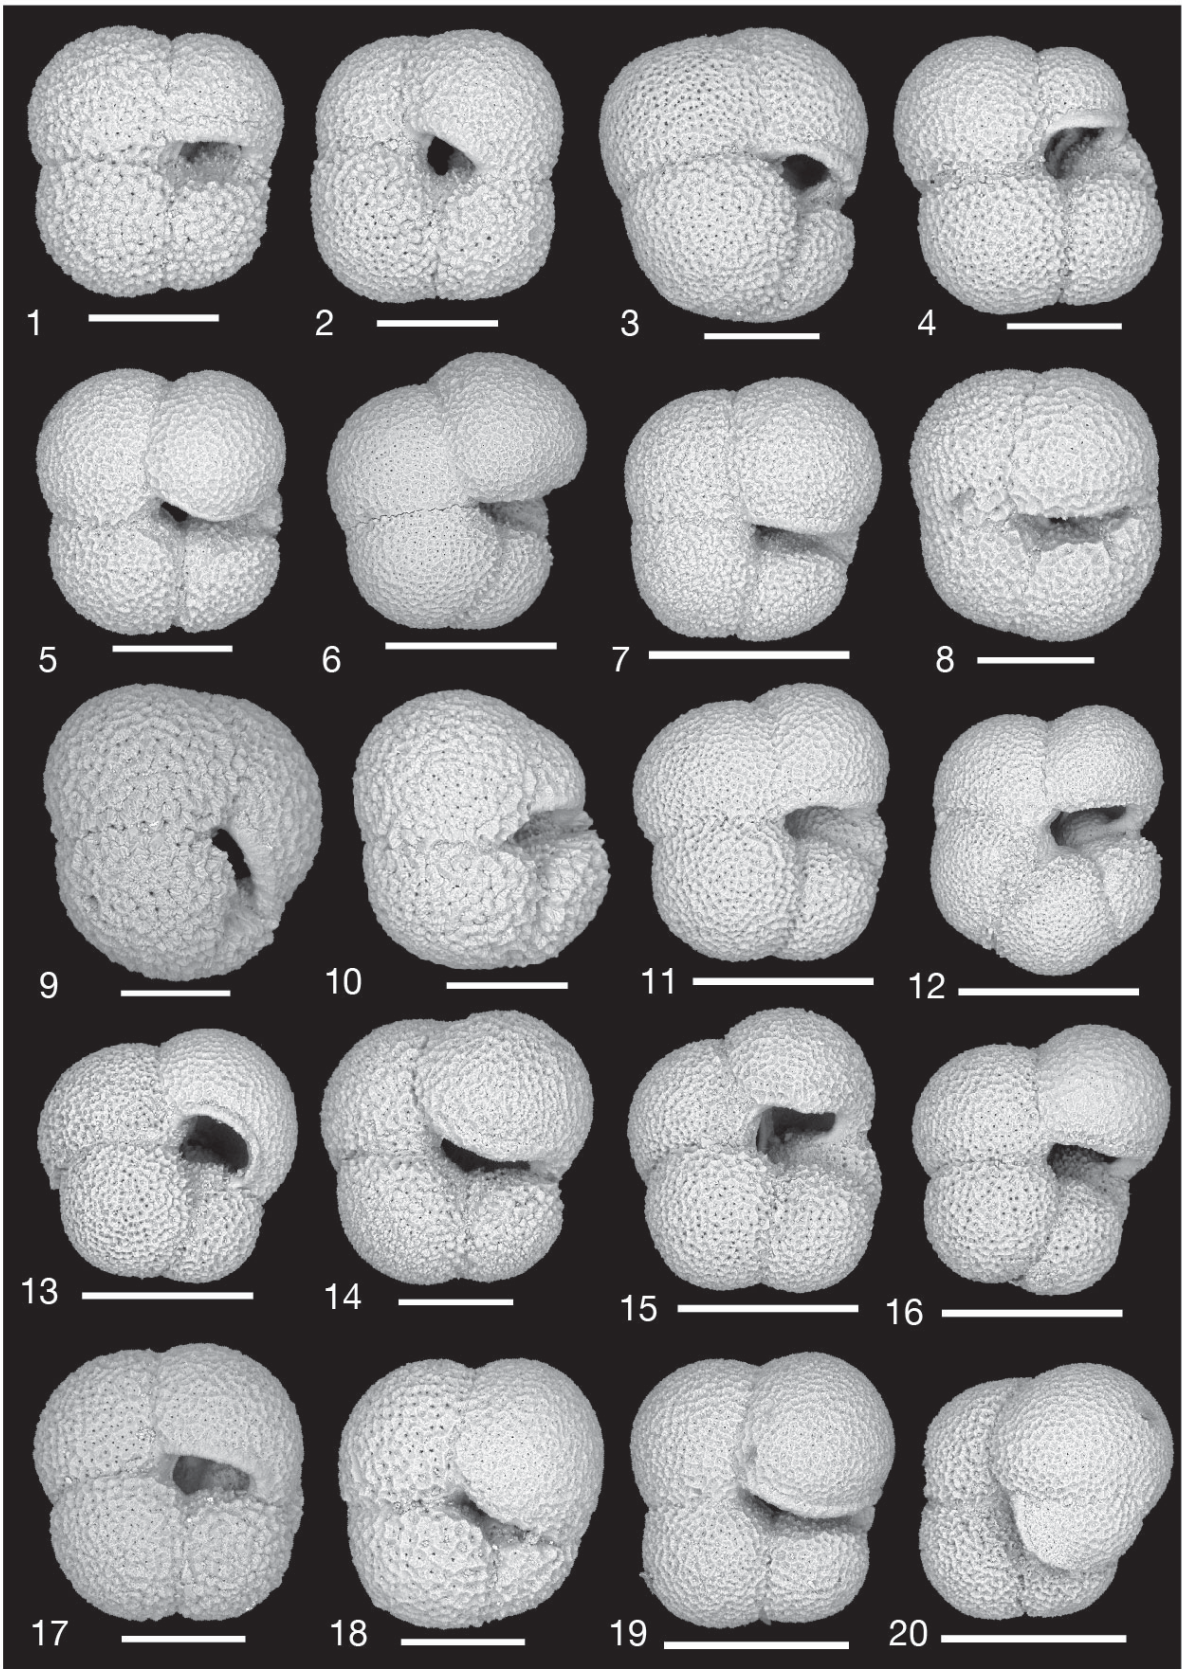

## Supplementary Figure 2: Probstack related age model and sedimentation rates

A:  $\delta^{18}\text{O}$  (‰) *G. bulloides* from IODP Site U1387 for the Probstack related age model (red) and the LR04 age model (black). Marine Isotopic Stages and Substages are indicated numbers and letters. B:  $\delta^{18}\text{O}$  (‰) *G. bulloides* from IODP Site U1385 on its Probstack related age model (Hodell et al., 2023b). Arrows between A and B indicate the tuning points between the two records, which remain at the same stratigraphic positions as for the tuning to the U1385 LR04 related age model. C: Sedimentation rates (cm/kyr) for IODP Site U1387 related to Probstack (red) and LR04 (black).

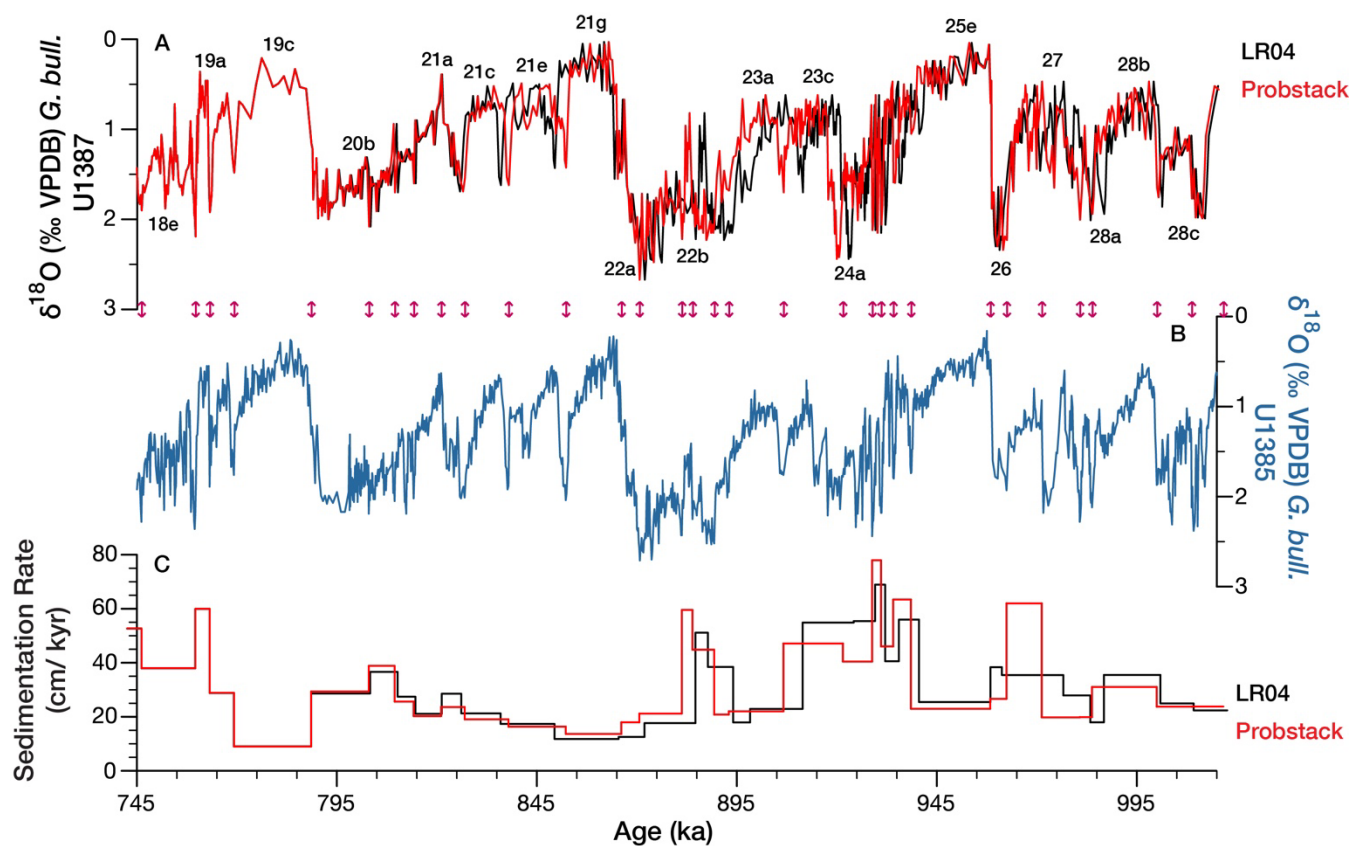

Supplement: Supplementary file 1 [file egusphere-2024-3185-supplement.pdf]
